# Supplementary material for: The widely used Ucp1-CreEvdr transgene elicits complex developmental and metabolic phenotypes
Source: PubMed Central journal article supplement — bioRxiv. 2023 Oct 20:2023.10.20.563165. Preprint. [Version 1] doi: 10.1101/2023.10.20.563165 (PMC10614962; doi:10.1101/2023.10.20.563165), 2023-10-20
Supplement: NIHPP2023.10.20.563165v1-supplement-1.pdf [file NIHPP2023.10.20.563165v1-supplement-1.pdf]

936  
937  
938  
939  
940  
941  
942  
943  
944  
945  
946  
947  
948  
949  
950  
951  
952  
953  
954  
955  
956  
957  
958  
959  
960  
961  
962  
963  
964  
965  
966  
967  
968  
969  
970  
971  
972  
973  
974  
975  
976  
977  
978  
979  
980  
981

**Figure S1:**

- (A) Experimental strategy for the identification of known and unknown location for transgenes in Mouse Genome Informatics (MGI) site.
- (B) Proportions of all transgenes (left) and Cre-drivers (right) transgenic mice with known location in the genome.
- (C) Copy number assay of Cre of control,  $1xUcp1-Cre^{Evd}$  and  $2xUcp1-Cre^{Evd}$  mice. n= 5 per genotype.
- (D) Expected and observed offspring genotypes obtained from  $1xUcp1-Cre^{Evd}$  to  $1xUcp1-Cre^{Evd}$  crosses. N=251 pups from 46 litters. Statistical significance was calculated using Chi-square test. \*\*\*P < 0.001.
- (E) Expected and observed offspring sex distribution obtained from  $1xUcp1-Cre^{Evd}$  to  $1xUcp1-Cre^{Evd}$  crosses. N=251 pups from 46 litters. Statistical significance was calculated using Chi-square test.
- (F) Growth curves of control,  $1xUcp1-Cre^{Evd}$  and  $2xUcp1-Cre^{Evd}$  females. n= 17 controls, 41  $1xUcp1-Cre^{Evd}$ , 6  $2xUcp1-Cre^{Evd}$ . All  $2xUcp1-Cre^{Evd}$  females analyzed in this growth curve survived up to week 6. \$ indicates significant differences between  $2xUcp1-Cre^{Evd}$  and control, & indicates significant differences between  $2xUcp1-Cre^{Evd}$  and  $1xUcp1-Cre^{Evd}$ .
- (G) Growth curves of control,  $1xUcp1-Cre^{Evd}$  and  $2xUcp1-Cre^{Evd}$  males. n= 23 controls, 46  $1xUcp1-Cre^{Evd}$ , 14  $2xUcp1-Cre^{Evd}$ . All  $2xUcp1-Cre^{Evd}$  males analyzed in this growth curve survived up to week 6. \$ indicates significant differences between  $2xUcp1-Cre^{Evd}$  and control, & indicates significant differences between  $2xUcp1-Cre^{Evd}$  and  $1xUcp1-Cre^{Evd}$ .
- (H) Body weights of control,  $1xUcp1-Cre^{Evd}$  and  $2xUcp1-Cre^{Evd}$  males. n= 6 controls, 6  $1xUcp1-Cre^{Evd}$ , 7  $2xUcp1-Cre^{Evd}$ .
- (I) BAT weights of control,  $1xUcp1-Cre^{Evd}$  and  $2xUcp1-Cre^{Evd}$  males. n= 6 controls, 6  $1xUcp1-Cre^{Evd}$ , 7  $2xUcp1-Cre^{Evd}$ .
- (J) WAT weights of control,  $1xUcp1-Cre^{Evd}$  and  $2xUcp1-Cre^{Evd}$  males. n= 6 controls, 6  $1xUcp1-Cre^{Evd}$ , 7  $2xUcp1-Cre^{Evd}$ .
- (K) Liver weight of control,  $1xUcp1-Cre^{Evd}$  and  $2xUcp1-Cre^{Evd}$  males. n= 6 controls, 6  $1xUcp1-Cre^{Evd}$ , 7  $2xUcp1-Cre^{Evd}$ .
- (L) Other organs weight of control,  $1xUcp1-Cre^{Evd}$  and  $2xUcp1-Cre^{Evd}$  males. n= 6 controls, 6  $1xUcp1-Cre^{Evd}$ , 7  $2xUcp1-Cre^{Evd}$ .
- (M) Skeletal muscles weight of control,  $1xUcp1-Cre^{Evd}$  and  $2xUcp1-Cre^{Evd}$  males. n= 6 controls, 6  $1xUcp1-Cre^{Evd}$ , 7  $2xUcp1-Cre^{Evd}$ .
- (N) qPCR analysis of Cre in adipose tissue depots of control,  $1xUcp1-Cre^{Evd}$  and  $2xUcp1-Cre^{Evd}$  females. n= 6.
- (O) qPCR analysis of Cre in adipose tissue depots of control,  $1xUcp1-Cre^{Evd}$  and  $2xUcp1-Cre^{Evd}$  males. n= 6.
- (P) Representative H&E images of fat depots and liver from control,  $1xUcp1-Cre^{Evd}$  and  $2xUcp1-Cre^{Evd}$  males. n= 4. Scale bar, 50µm.

Unless otherwise noted, data are mean + SEM and statistical significance was calculated using one-way ANOVA followed by Tukey's multiple comparisons test. \*P < 0.05, \*\*P < 0.01, \*\*\*P < 0.001.

1003 **Figure S2:**

1004 (A) Schematic representation of the location of the six probe pairs used for TLA  
1005 analysis. See also Table S3.

1006 (B) Whole genome TLA mapping analysis of  $1xUcp1-Cre^{Evdv}$  genome using probes  
1007 surrounding the BAC 148M1 sequence.

1008

1009

1059 **Figure S3:**

- 1060 (A) RNA-seq comparing female  $1xUcp1-Cre^{EvdR}$  and  $2xUcp1-Cre^{EvdR}$  iBAT gene  
1061 expression (left). Each dot represents one gene. Corresponding GO analysis  
1062 (right). Genes and pathways significantly enriched in  $1xUcp1-Cre^{EvdR}$  are labeled  
1063 in red and those enriched in  $2xUcp1-Cre^{EvdR}$  are labeled in brown.
- 1064 (B) RNA-seq comparing female  $1xUcp1-Cre^{EvdR}$  and  $2xUcp1-Cre^{EvdR}$  psWAT gene  
1065 expression (left). Each dot represents one gene. Corresponding GO analysis  
1066 (right). Genes and pathways significantly enriched in  $1xUcp1-Cre^{EvdR}$  are labeled  
1067 in red and those enriched in  $2xUcp1-Cre^{EvdR}$  are labeled in brown.
- 1068 (C) qPCR analysis of iBAT of control,  $1xUcp1-Cre^{EvdR}$  and  $2xUcp1-Cre^{EvdR}$  males at 6  
1069 weeks of age. n= 6.
- 1070 (D) qPCR analysis of psWAT of control,  $1xUcp1-Cre^{EvdR}$  and  $2xUcp1-Cre^{EvdR}$  males at  
1071 6 weeks of age. n= 6.
- 1072 (E) qPCR analysis of pgWAT of control,  $1xUcp1-Cre^{EvdR}$  and  $2xUcp1-Cre^{EvdR}$  males at  
1073 6 weeks of age. n= 6.
- 1074 (F) Body weight change and tissue weights of control and  $1xUcp1-Cre^{EvdR}$  females  
1075 after cold challenge. n= 3 control RT, 3  $1xUcp1-Cre^{EvdR}$  RT, 3 control cold, 4  
1076  $1xUcp1-Cre^{EvdR}$  cold. Statistical significance was calculated using unpaired t-test  
1077 between RT and cold samples.
- 1078 (G) Representative H&E images of fat depots from control,  $1xUcp1-Cre^{EvdR}$  females  
1079 after cold challenge. n= 4. Scale bar, 50 $\mu$ m.
- 1080 (H) qPCR analysis of iBAT of control and  $1xUcp1-Cre^{EvdR}$  females after cold  
1081 challenge or maintained at room temperature. n= 3. Statistical significance was  
1082 calculated using unpaired t-test between RT and cold samples.
- 1083 (I) qPCR analysis of psWAT of control and  $1xUcp1-Cre^{EvdR}$  females after cold  
1084 challenge or maintained at room temperature. n= 3. Statistical significance was  
1085 calculated using unpaired t-test between RT and cold samples.
- 1086 (J) qPCR analysis of pgWAT of control and  $1xUcp1-Cre^{EvdR}$  females after cold  
1087 challenge or maintained at room temperature. n= 3. Statistical significance was  
1088 calculated using unpaired t-test between RT and cold samples.

1089  
1090 Unless otherwise noted, data are mean + SEM and statistical significance was  
1091 calculated using one-way ANOVA followed by Tukey's multiple comparisons test.  
1092 \*P < 0.05, \*\*P < 0.01, \*\*\*P < 0.001.  
1093

1134 **Figure S4:**

- 1135 (A) Schematic representation of the genomic structure of the *Ucp1*-floxed  
1136 (*Ucp1<sup>tm1a</sup>(EUCOMM)Hmgu*) allele.
- 1137 (B) Portion of the genomic sequence used for development of a specific FRT copy  
1138 number assay.
- 1139 (C) Body weight of control, *Ucp1-fl/+<sup>Ucp1-CreEvd</sup>* and *Ucp1-fl/fl<sup>Ucp1-CreEvd</sup>* males. n= 14  
1140 control, 13 *Ucp1-fl/+<sup>Ucp1-CreEvd</sup>*, 9 *Ucp1-fl/fl<sup>Ucp1-CreEvd</sup>*.
- 1141 (D) Liver weight of control, *Ucp1-fl/+<sup>Ucp1-CreEvd</sup>* and *Ucp1-fl/fl<sup>Ucp1-CreEvd</sup>* males. n= 14  
1142 control, 13 *Ucp1-fl/+<sup>Ucp1-CreEvd</sup>*, 9 *Ucp1-fl/fl<sup>Ucp1-CreEvd</sup>*.
- 1143 (E) Muscle weights of control, *Ucp1-fl/+<sup>Ucp1-CreEvd</sup>* and *Ucp1-fl/fl<sup>Ucp1-CreEvd</sup>* males. n=  
1144 14 control, 13 *Ucp1-fl/+<sup>Ucp1-CreEvd</sup>*, 9 *Ucp1-fl/fl<sup>Ucp1-CreEvd</sup>*.
- 1145 (F) Other organs weight of control, *Ucp1-fl/+<sup>Ucp1-CreEvd</sup>* and *Ucp1-fl/fl<sup>Ucp1-CreEvd</sup>* males.  
1146 n= 14 control, 13 *Ucp1-fl/+<sup>Ucp1-CreEvd</sup>*, 9 *Ucp1-fl/fl<sup>Ucp1-CreEvd</sup>*.
- 1147 (G) qPCR analysis of *Cre* in iBAT of control, *Ucp1-fl/+<sup>Ucp1-CreEvd</sup>* and *Ucp1-fl/fl<sup>Ucp1-</sup>*  
1148 *CreEvd* males. n=8.
- 1149 (H) qPCR analysis of *Cre* in psWAT of control, *Ucp1-fl/+<sup>Ucp1-CreEvd</sup>* and *Ucp1-fl/fl<sup>Ucp1-</sup>*  
1150 *CreEvd* males. Values are relative to those of iBAT control. n=8.
- 1151 (I) qPCR analysis of *Cre* in pgWAT of control, *Ucp1-fl/+<sup>Ucp1-CreEvd</sup>* and *Ucp1-fl/fl<sup>Ucp1-</sup>*  
1152 *CreEvd* males. Values are relative to those of iBAT control. n=8.
- 1153 (J) qPCR analysis in iBAT of control, *Ucp1-fl/+<sup>Ucp1-CreEvd</sup>* and *Ucp1-fl/fl<sup>Ucp1-CreEvd</sup>*  
1154 males. n=8.
- 1155 (K) qPCR analysis in psWAT of control, *Ucp1-fl/+<sup>Ucp1-CreEvd</sup>* and *Ucp1-fl/fl<sup>Ucp1-CreEvd</sup>*  
1156 males. n=8.
- 1157 (L) qPCR analysis in pgWAT of control, *Ucp1-fl/+<sup>Ucp1-CreEvd</sup>* and *Ucp1-fl/fl<sup>Ucp1-CreEvd</sup>*  
1158 males. n=8.
- 1159 (M) Liver weight of control and *Ucp1-fl/fl<sup>Ucp1-CreERT2Biat</sup>* males. n= 7 control, 6 *Ucp1-*  
1160 *fl/fl<sup>Ucp1-CreERT2Biat</sup>*.
- 1161 (N) Muscles weight of control and *Ucp1-fl/fl<sup>Ucp1-CreERT2Biat</sup>* males. n= 7 control, 6 *Ucp1-*  
1162 *fl/fl<sup>Ucp1-CreERT2Biat</sup>*.
- 1163 (O) Other organs weight of control and *Ucp1-fl/fl<sup>Ucp1-CreERT2Biat</sup>* males. n= 7 control, 6  
1164 *Ucp1-fl/fl<sup>Ucp1-CreERT2Biat</sup>*.

1165

1166 Unless otherwise noted, data are mean + SEM. Statistical significance was  
1167 calculated using unpaired t-test or one-way ANOVA followed by Tukey's multiple  
1168 comparisons test. \*P < 0.05, \*\*P < 0.01, \*\*\*P < 0.001.

1169

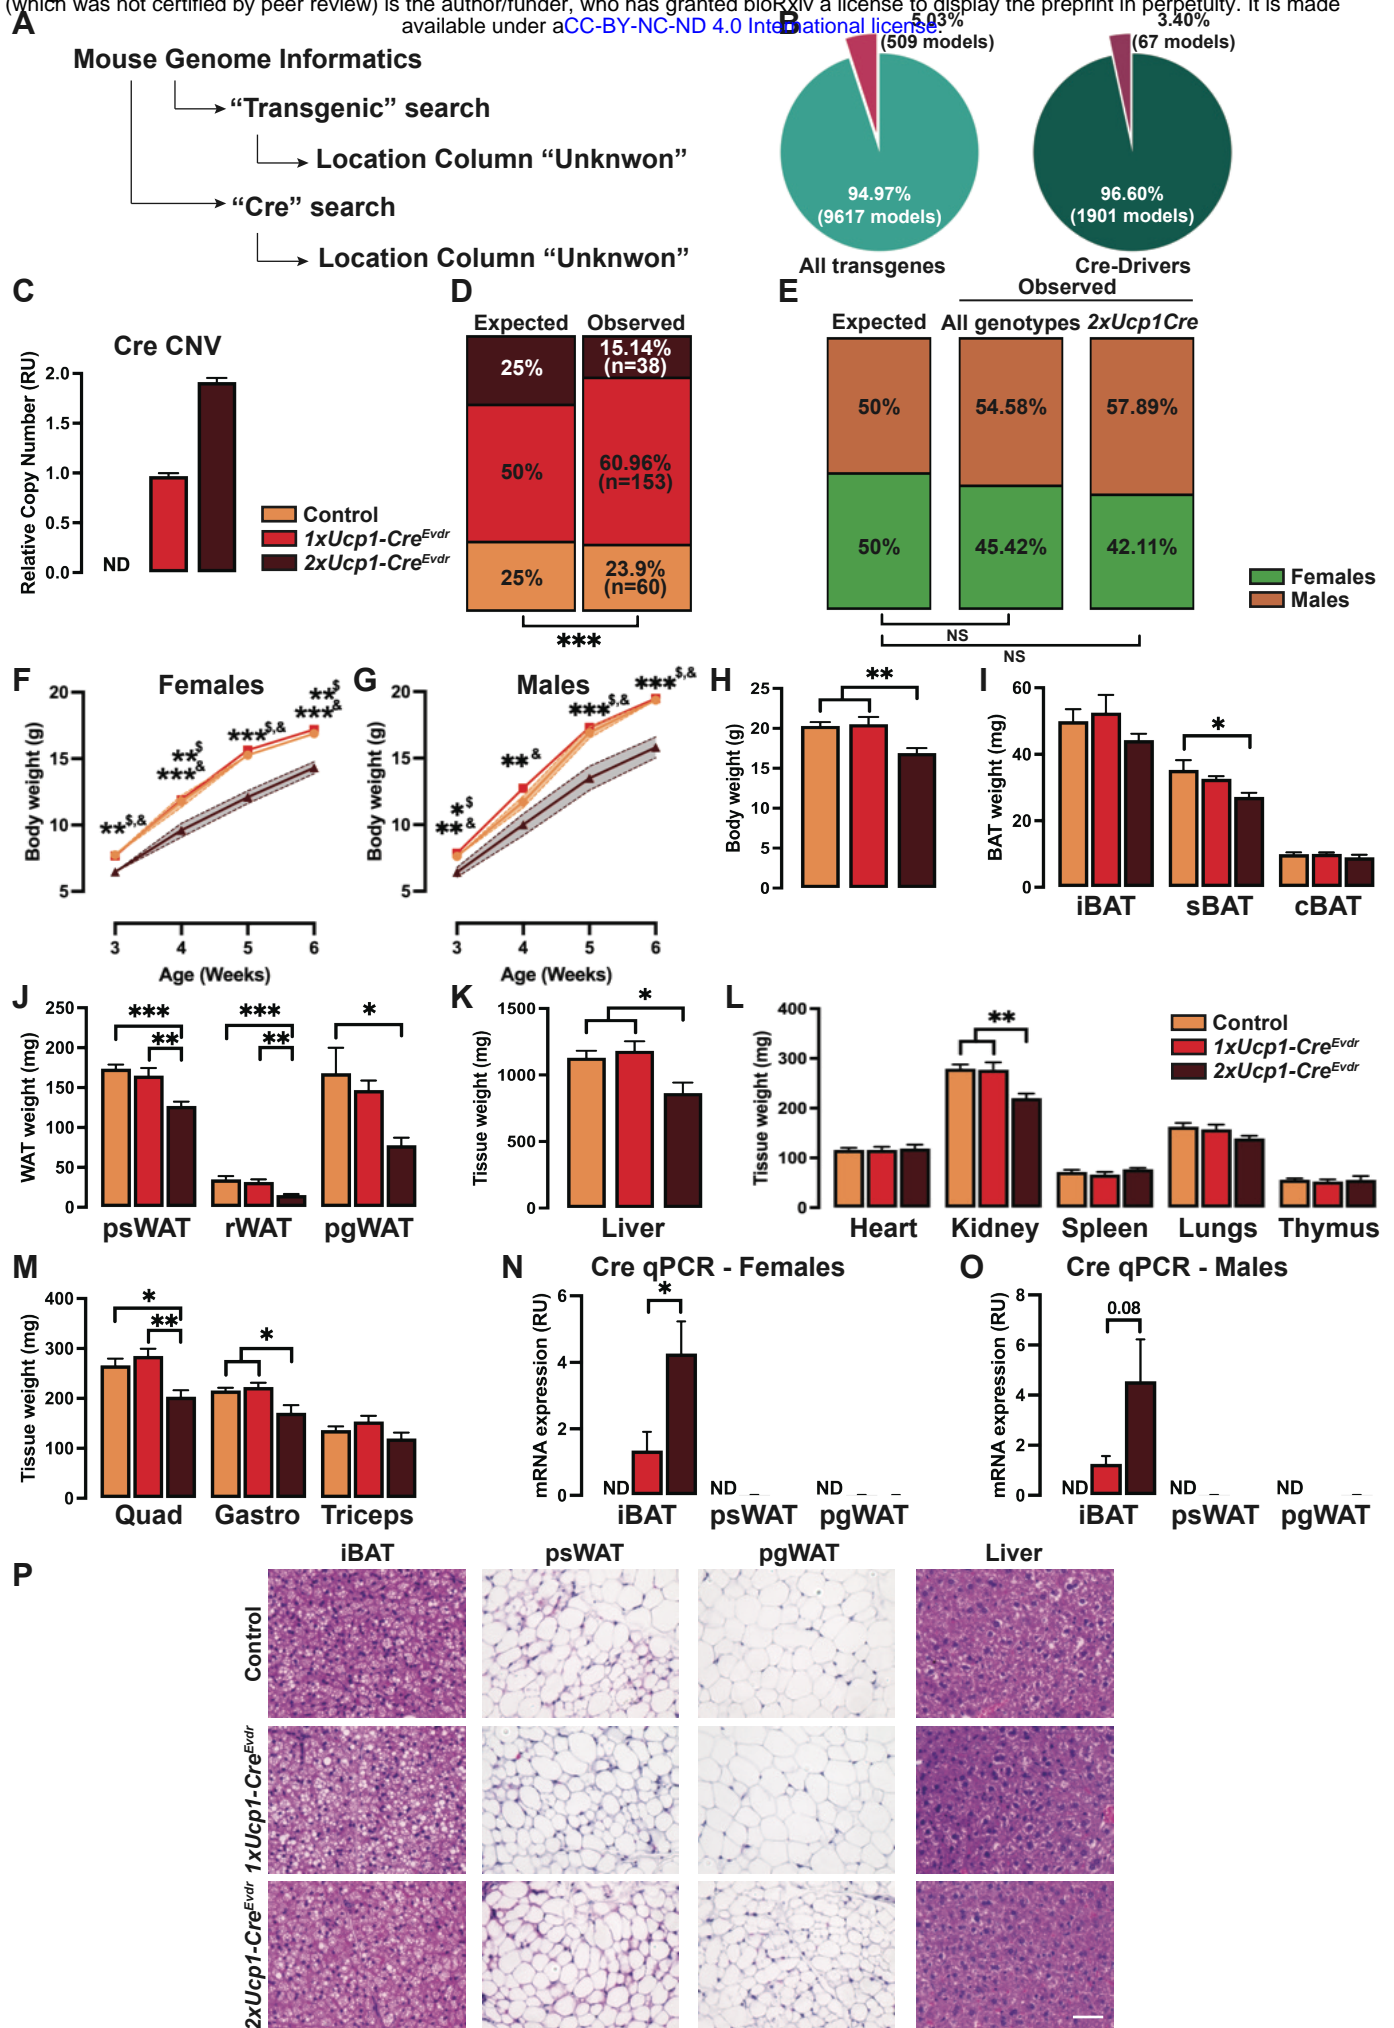

## Figure S2

A

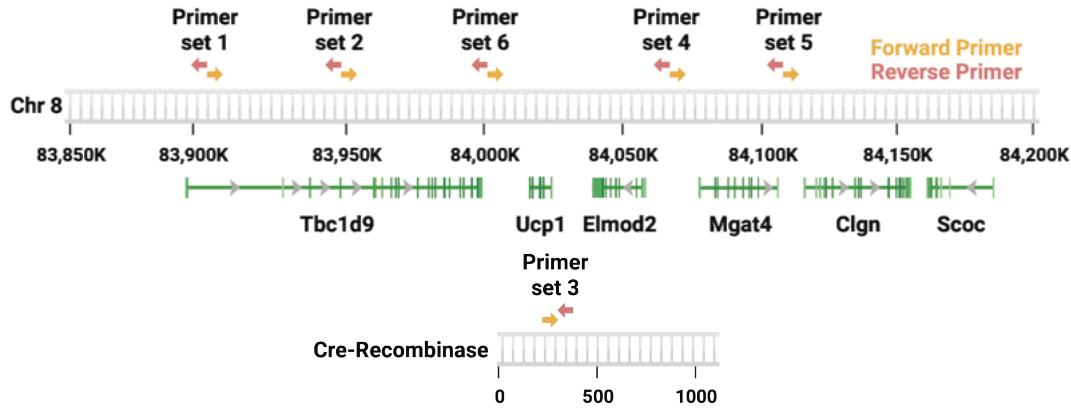

B

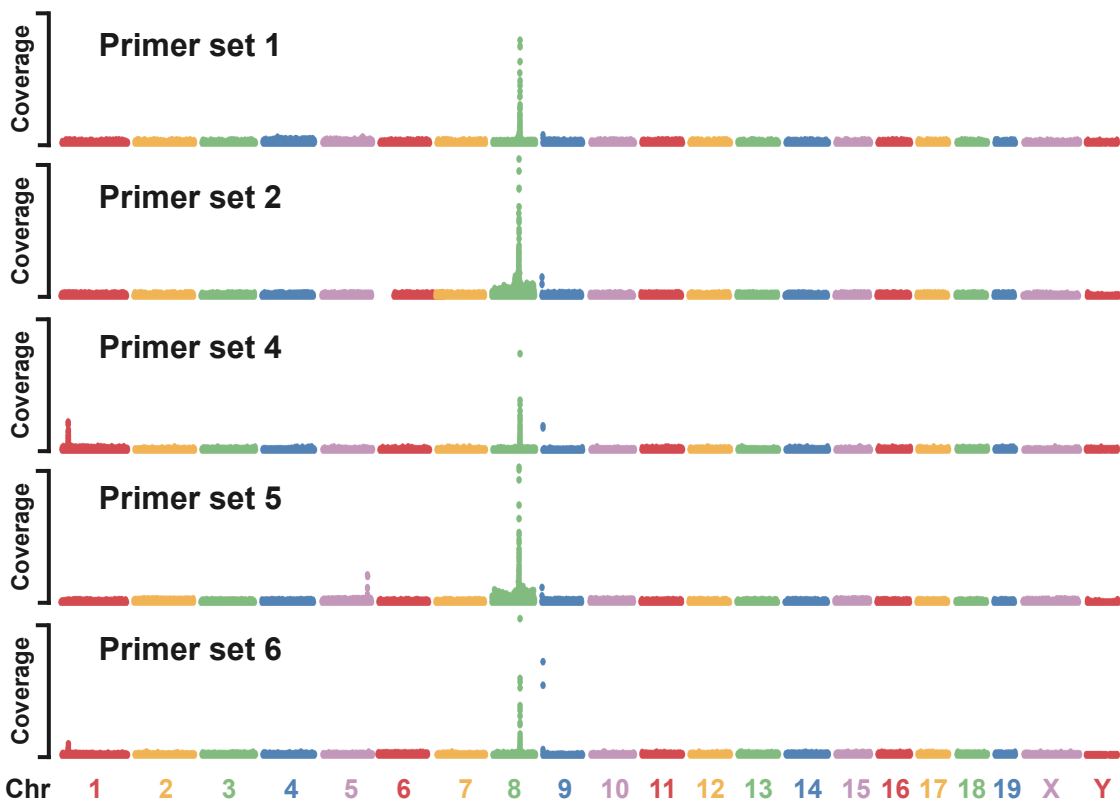

**Figure S3**

**1xUcp1-Cre<sup>Evdr</sup> vs 2xUcp1-Cre<sup>Evdr</sup>**

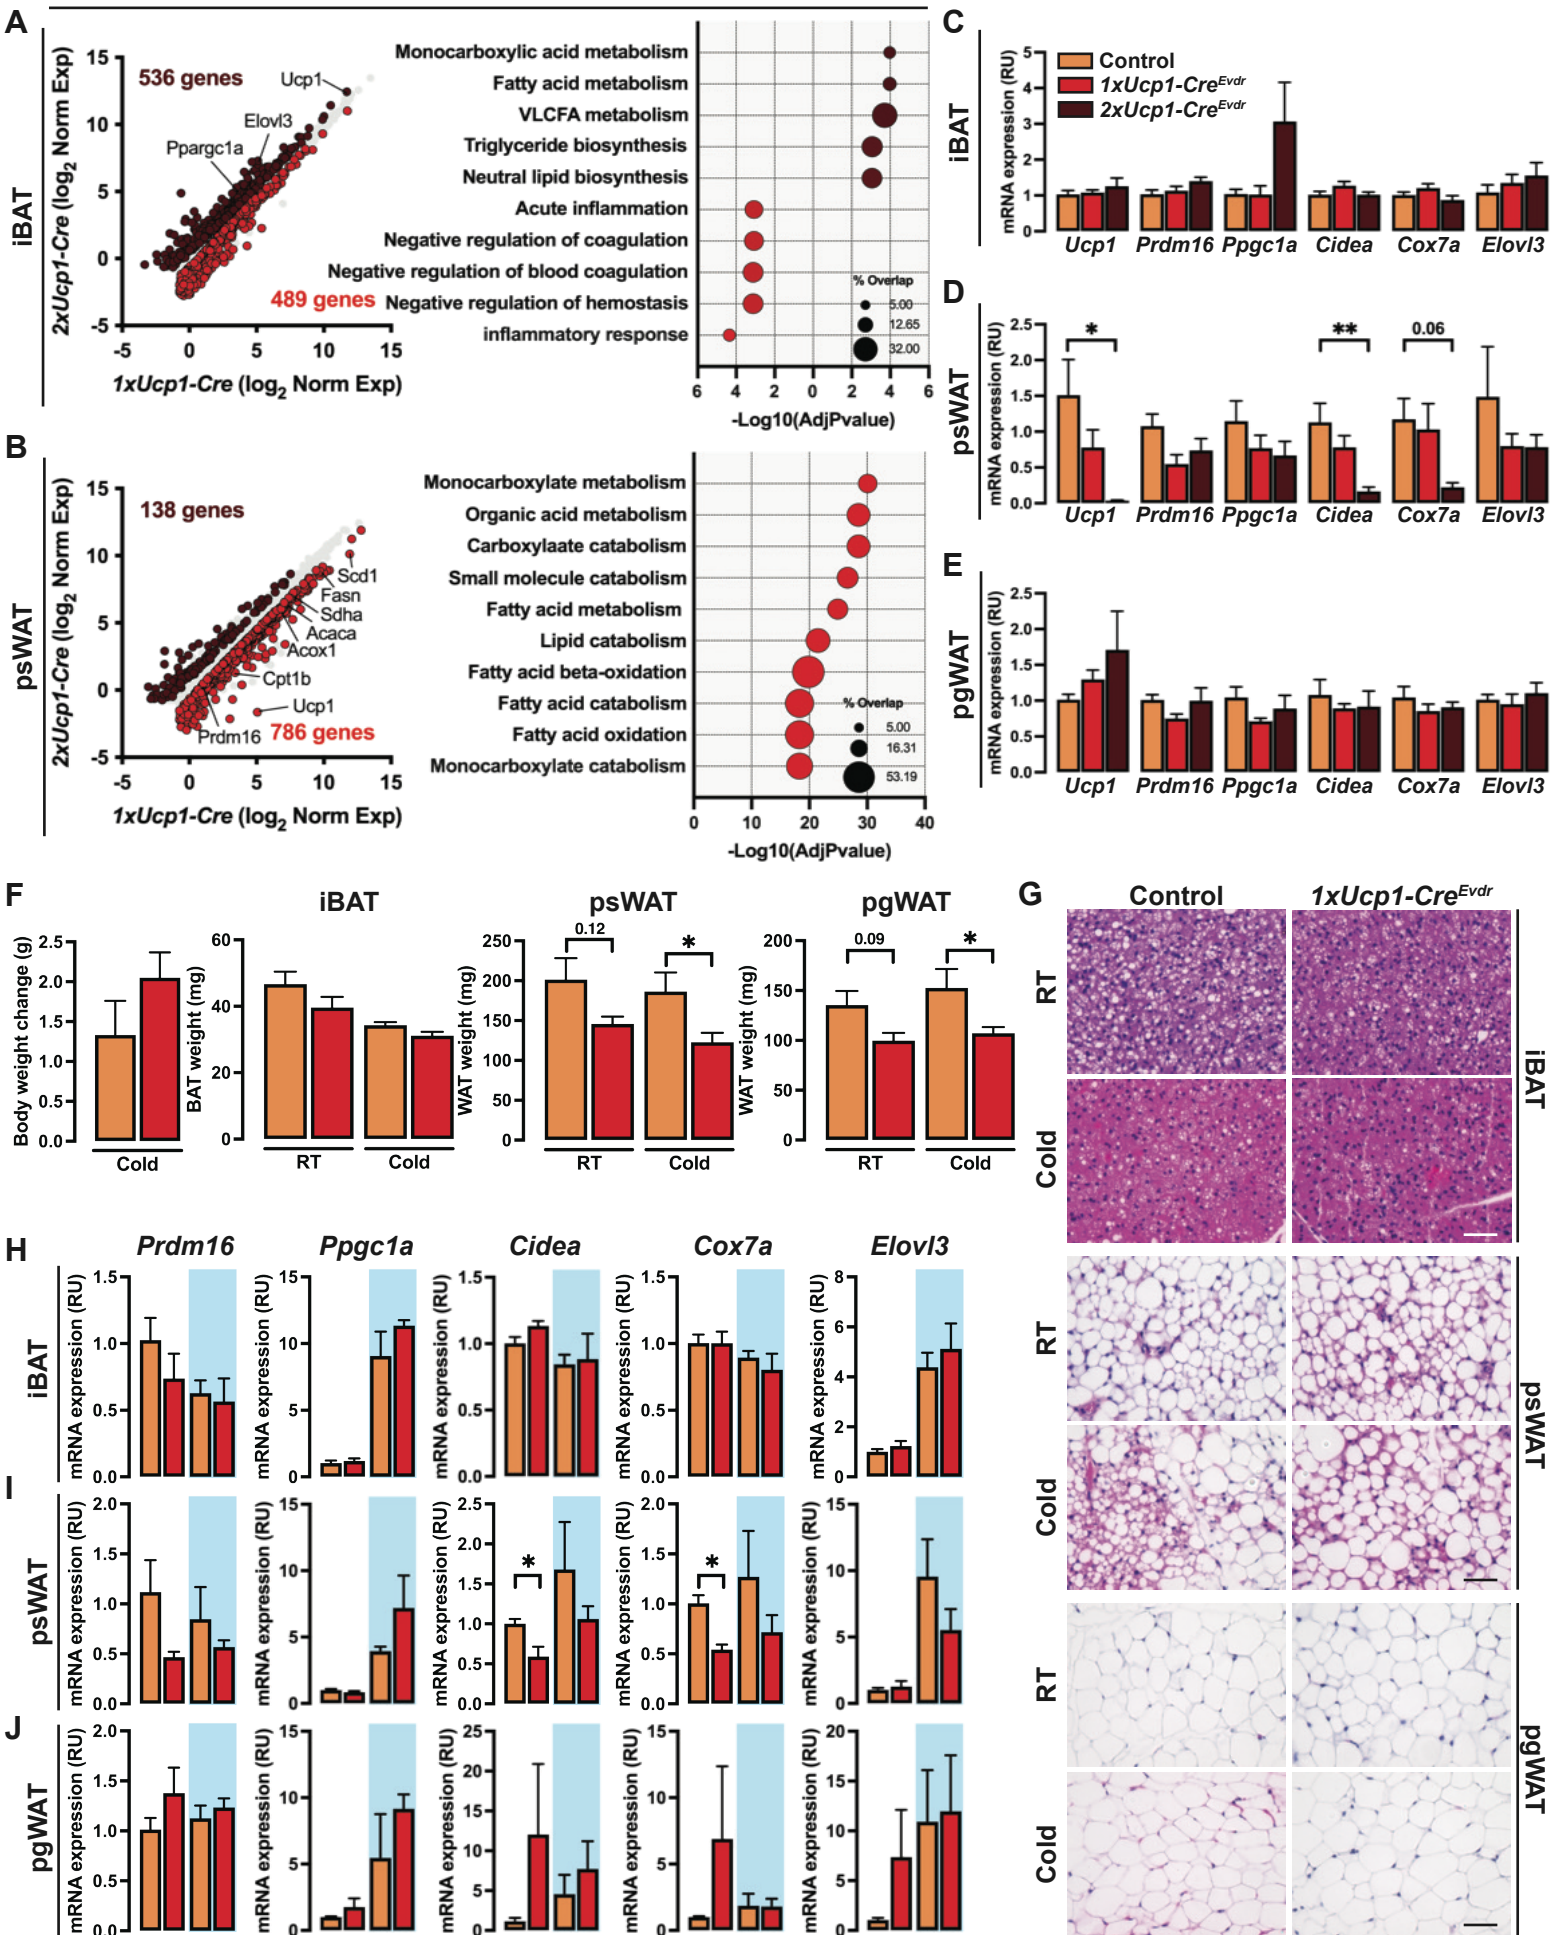

## Figure S4

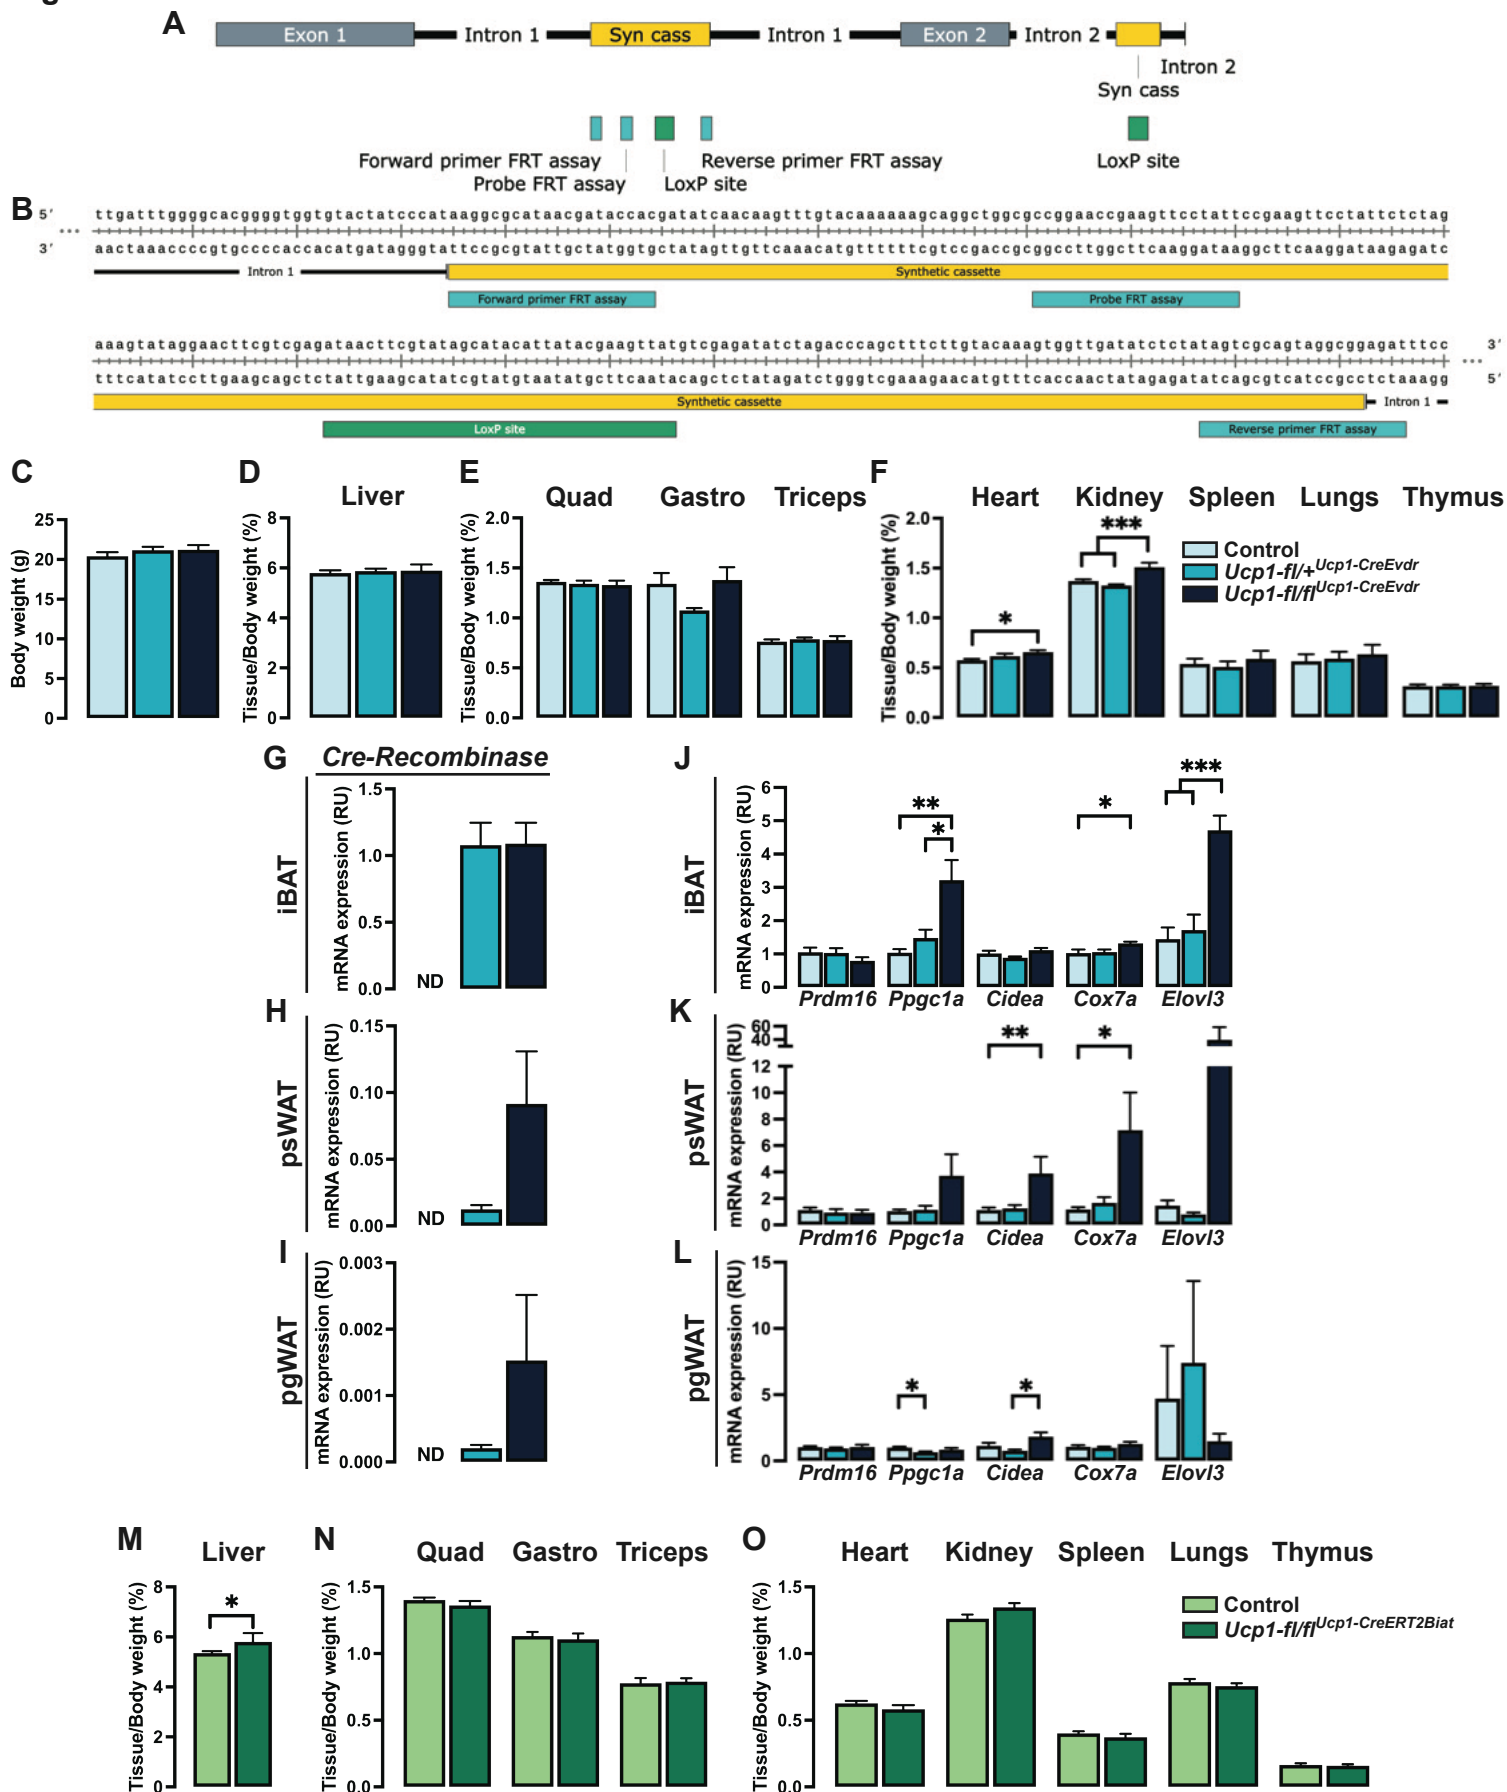



**Table S1. Mouse primers**

| <b>Gene</b>         | <b>Forward primer (5'-3')</b> | <b>Reverse primer (5'-3')</b> |
|---------------------|-------------------------------|-------------------------------|
| <i>Tbp</i>          | ACCTTCACCAATGACTCCTATG        | TGACTGCAGCAAATCGCTTGG         |
| <i>Elovl3</i>       | TCCGCGTTCTCATGTAGGTCT         | GGACCTGATGCAACCCTATGA         |
| <i>Prdm16</i>       | GACATTCCAATCCCACCAGA          | CACCTCTGTATCCGTCAGCA          |
| <i>Ppargc1alpha</i> | CCCTGCCATTGTTAAGACC           | TGCTGCTGTTCCCTGTTTTTC         |
| <i>cox7a</i>        | GCTGCTGAGGAGGCAAATGAGG        | CCATTCCCCCGCCTTTCAAG          |
| <i>Cidea</i>        | TGCTCTTCTGTATCGCCCAGT         | GCCGTGTTAAGGAATCTGCTG         |
| <i>UCP1</i>         | GGATTGGCCTCTACGACTCA          | TGCCACACCTCCAGTCATTA          |
| <i>Cre</i>          | GCGGTCTGGCAGTAAAACTATC        | GTGAAACAGCATTGCTGTCACT        |

**Table S2. Antibodies**

| <b>Antigen</b> | <b>Source</b>           | <b>Concentration</b> |
|----------------|-------------------------|----------------------|
| <i>UCP1</i>    | Abcam (ab10983)         | 1:1000               |
| <i>Tubulin</i> | Cell Signaling (cs2125) | 1:1000               |

| <b>Table S3. TLA Primer Sets</b> |           |                         |
|----------------------------------|-----------|-------------------------|
| <b>Primers Set</b>               |           | <b>Sequence (5'-3')</b> |
| 1                                | <i>Rv</i> | ACAACAGGAAGCACATACAT    |
|                                  | <i>Fw</i> | GGTATATGTAGTGCGTGTGT    |
| 2                                | <i>Rv</i> | GACACAGATGAGCAACAAAG    |
|                                  | <i>Fw</i> | CCCAGGTTAATCTGAGTTCC    |
| 3                                | <i>Rv</i> | GTTCGAACGCACTGATTTTC    |
|                                  | <i>Fw</i> | AACCAGTGAAACAGCATTG     |
| 4                                | <i>Rv</i> | AGAGATACAGCAGAGTGACT    |
|                                  | <i>Fw</i> | TATCCACACTTGTCTGAAGC    |
| 5                                | <i>Rv</i> | GTGTCAGAGTAACAAAGAGTG   |
|                                  | <i>Fw</i> | CTGACCCTGCTATTCTTCC     |
| 6                                | <i>Rv</i> | GGAGCAAGGACTTTAGAGTT    |
|                                  | <i>Fw</i> | GACTGACTCAATTGCACATG    |

**Table S4. Copy Number Assays**

| <i>Premade</i> |             |               |
|----------------|-------------|---------------|
| Target         | Location    | Assay ID      |
| <i>UCP1</i>    | Intron 3    | Mm00260416_cn |
| <i>CRE</i>     | Unavailable | Mr00635245_cn |
| <i>Tfrc</i>    | Exon 17     | 4458366       |

| <i>Custom designed</i> |                      |                     |                      |               |
|------------------------|----------------------|---------------------|----------------------|---------------|
| Target                 | Forward Primer       | Reverse Primer      | Probe                | Assay ID      |
| FRT                    | aaggcgcataacgataccac | atctcgcctactgcgacta | ccggaaccgaagtctctatt | FRT_CNVD2W9GY |

**ddPCR Assay**

| Target      | Location                         | Probe Fluorophore | Assay ID         |
|-------------|----------------------------------|-------------------|------------------|
| <i>Tfrc</i> | mm10 chr16:32608778-32608900:+   | HEX               | dMmuCNS420644255 |
| <i>Cre</i>  | 16-138 bp of <i>Cre</i> sequence | FAM               | dCNS325197214    |
